# Supplementary material
Source: PubMed Central journal article supplement (PMC9350855)
Supplement: NIHMS1816672-supplement-mmc1.pdf [file NIHMS1816672-supplement-mmc1.pdf]

**Cell Systems, Volume 13**

**Supplemental information**

**Systematically quantifying morphological features  
reveals constraints on organoid phenotypes**

**Lauren E. Beck, Jasmine Lee, Christopher Coté, Margaret C. Dunagin, Ilya Lukonin, Nikkita Salla, Marcello K. Chang, Alex J. Hughes, Joseph D. Mornin, Zev J. Gartner, Prisca Liberali, and Arjun Raj**

# Supplemental Figure 1

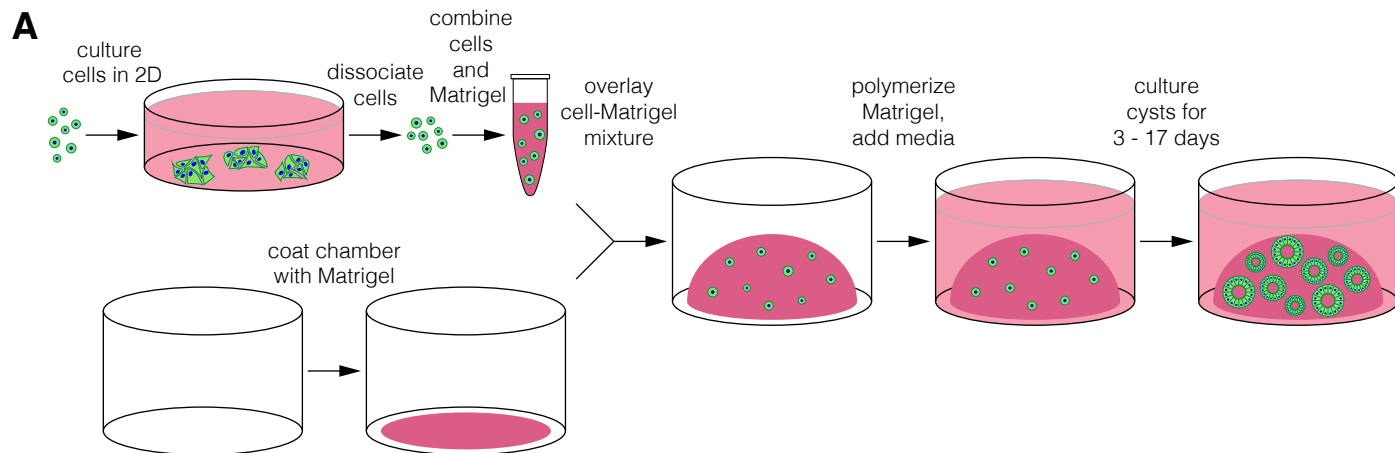

**Supplemental Figure 1: Schematic for MDCK cyst culture technique.**

**A.** MDCK cells are maintained in two-dimensional culture. When the cells are sufficiently confluent, they are dissociated into a single cell suspension. Cells are added to liquid Matrigel and the cell-Matrigel mixture is plated into a cell culture chamber already coated with pure Matrigel. After the Matrigel has polymerized, media can be added and the cysts can be cultured for at least 17 days. See methods for more information.

# Supplemental Figure 2

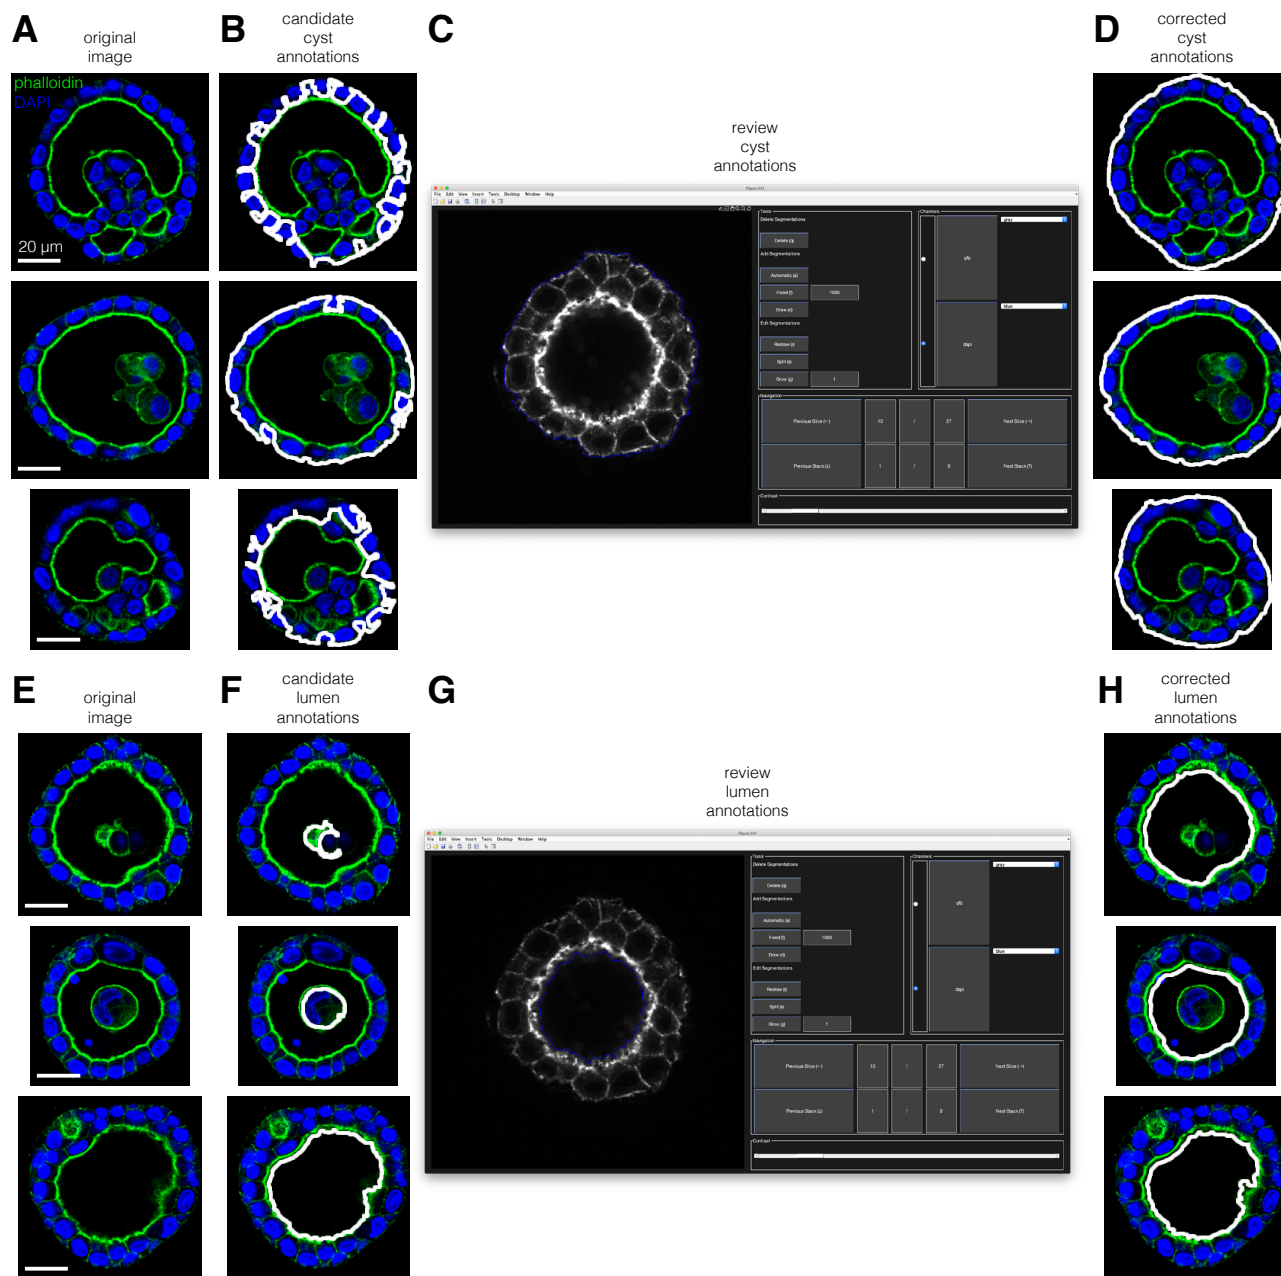

**Supplemental Figure 2: Manually correcting 2D cyst and lumen annotations.**

- A.** Three example MDCK cysts, whose candidate annotations are representative of the range of annotations seen for all MDCK cysts. The scale bar represents 20  $\mu\text{m}$ .
- B.** Example candidate annotations for the cyst boundary.
- C.** Our user interface for viewing and correcting 2D annotations.
- D.** Example annotations for the cyst boundary after correction.
- E.** Three example MDCK cysts, whose candidate annotations are representative of the range of annotations seen for all MDCK cysts. The scale bar represents 20  $\mu\text{m}$ .
- F.** Example candidate annotations for the lumen boundaries.
- G.** Our user interface for viewing and correcting 2D annotations.
- H.** Example annotations for the lumen boundaries after correction.

# Supplemental Figure 3

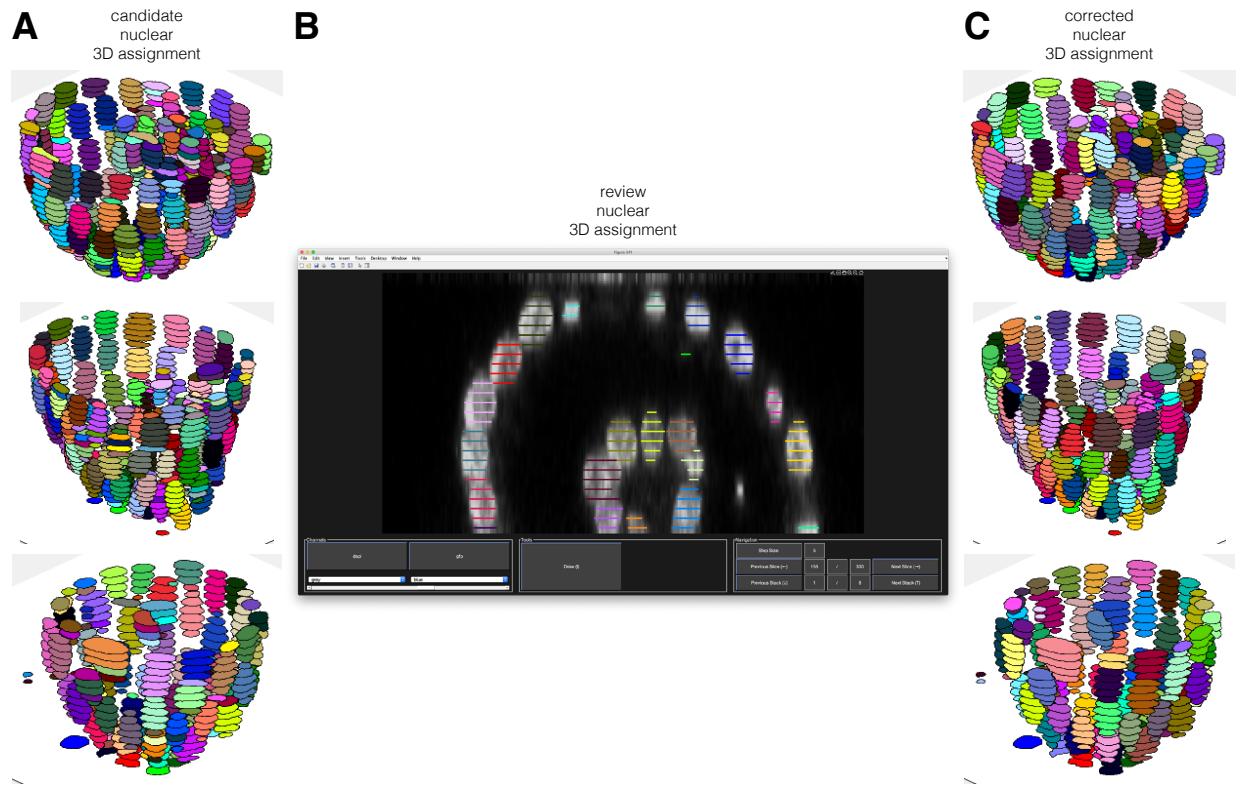

**Supplemental Figure 3: Manually correcting 3D nuclear annotations.**

- A.** Example candidate nuclear annotations, color-coded by which 3D object they belong to.
- B.** Our user interface for viewing and correcting 3D nuclear annotations.
- C.** Example nuclear annotations after they have been manually corrected.

## Supplemental Figure 4

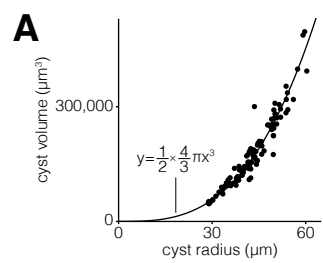



**Supplemental Figure 4: Cyst volume scales with cyst radius to the third.**

**A.** Cyst volume versus cyst radius for 102 7-11 day old MDCK cysts. Reference line indicates the relationship between radius and volume of half a sphere.

# Supplemental Figure 5

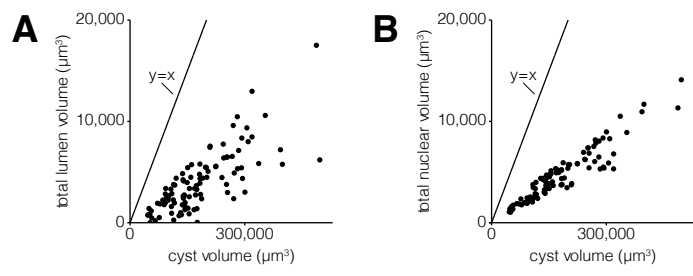

**Supplemental Figure 5: Total lumen and nuclear volumes are less than cyst volume.**

**A.** Total lumen volume versus cyst volume for 102 7-11 day old MDCK cysts. Reference line indicates  $y = x$ .

**B.** Total nuclear volume versus cyst volume for 102 7-11 day old MDCK cysts. Reference line indicates  $y = x$ .

# Supplemental Figure 6

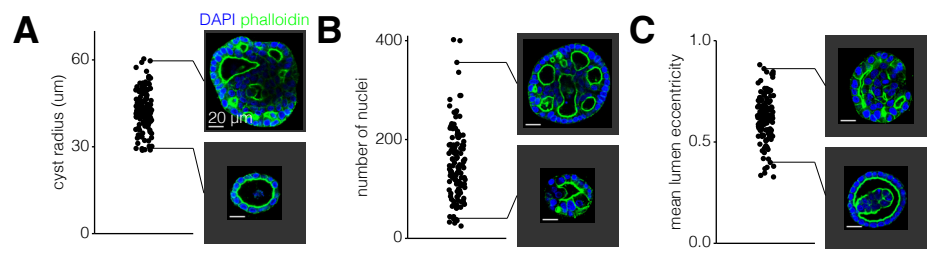

**Supplemental Figure 6: Examples MDCK cysts with high and low values for cyst morphological features.**

**A.** Cyst radius for 102 7-11 day old MDCK cysts with example images. The scale bar represents 20  $\mu\text{m}$ .

**B.** Number of nuclei for 102 7-11 day old MDCK cysts with example images. The scale bar represents 20  $\mu\text{m}$ .

**C.** Mean lumen eccentricity for 102 7-11 day old MDCK cysts with example images. The scale bar represents 20  $\mu\text{m}$ .

# Supplemental Figure 7

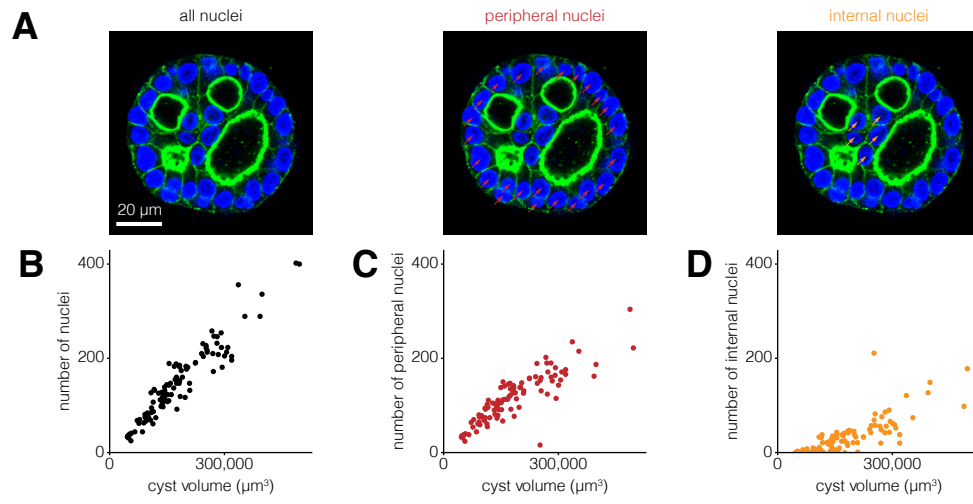

**Supplemental Figure 7: Peripheral scale sublinearly and internal nuclei scale superlinearly with cyst volume.**

**A.** Example MDCK cyst (representative of 102 unperturbed MDCK cysts of ages 7-11 days) with peripheral nuclei annotated with a red dot and internal nuclei annotated with an orange dot. The scale bar represents 20  $\mu\text{m}$ .

**B.** Number of nuclei versus cyst volume for 102 7-11 day old MDCK cysts.

**C.** Number of peripheral nuclei versus cyst volume for 102 7-11 day old MDCK cysts.

**D.** Number of internal nuclei versus cyst volume for 102 7-11 day old MDCK cysts.

## Supplemental Figure 8

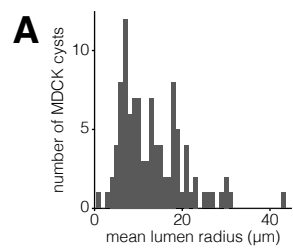



**Supplemental Figure 8: MDCK cysts may have a minimum size for lumens.**

**A.** Histogram (with a bin width of 1  $\mu\text{m}$ ) of mean lumen radius for 102 MDCK cysts cultured for 7-11 days.

# Supplemental Figure 9

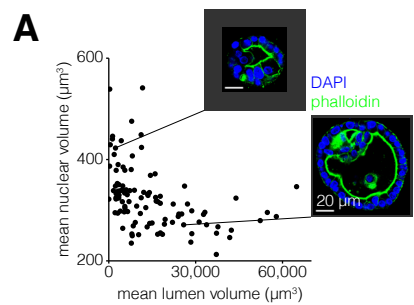

**Supplemental Figure 9: Mean nuclear size is inversely correlated with mean lumen size.**  
**A.** Mean nuclear volume versus mean lumen volume for 102 7-11 day old MDCK cysts with example images. The scale bar represents 20  $\mu\text{m}$ .

# Supplemental Figure 10

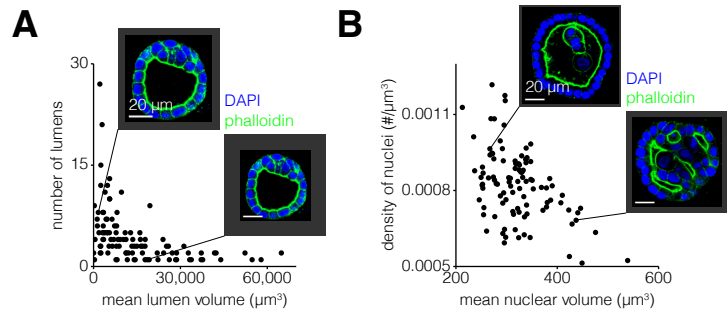

**Supplemental Figure 10: The number of lumens and nuclei are inversely correlated with their mean volume.**

**A.** Number of lumens versus mean lumen volume for 102 7-11 day old MDCK cysts with example images. The scale bar represents 20  $\mu\text{m}$ .

**B.** Density of nuclei versus mean nuclear volume for 102 7-11 day old MDCK cysts with example images. The scale bar represents 20  $\mu\text{m}$ .

# Supplemental Figure 11

**A**

**PCA**

**sparse PCA**

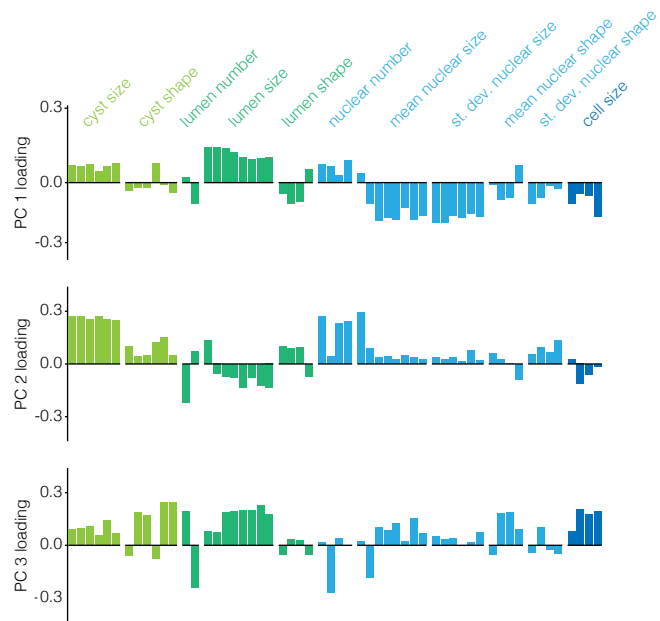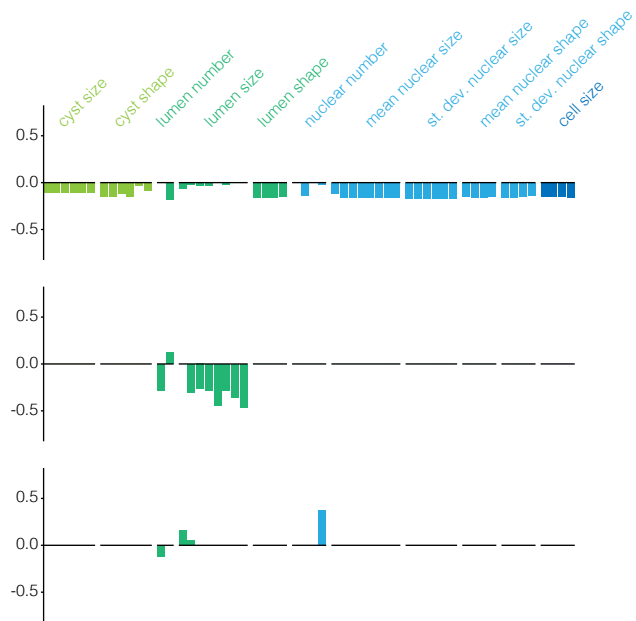

**Supplemental Figure 11: Sparse PCA reveals similar constraints to traditional PCA.**

**A.** Loading of each feature on principal components one through three for both standard PCA and sparse PCA. Each feature is color-coded by what structure (cyst, lumen, nucleus, or cell) it describes.

# Supplemental Figure 12

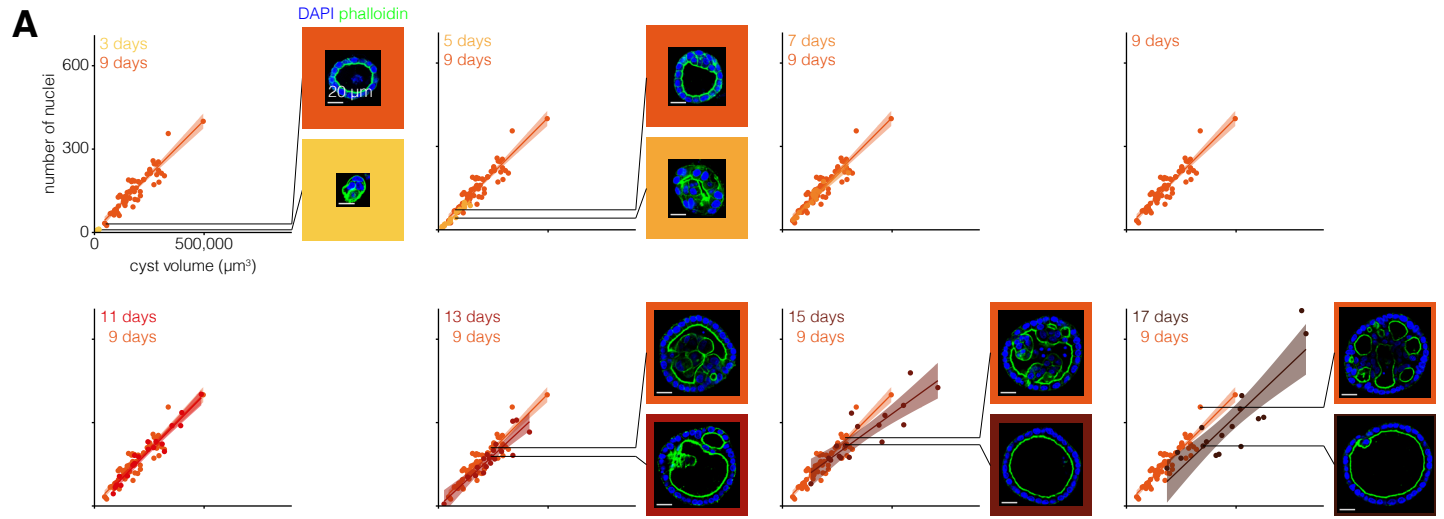



**Supplemental Figure 12: Constraint on number of nuclei and cyst volume varies with MDCK cyst age.**

**A.** Number of nuclei versus cyst volume for 17-64 MDCK cysts of each age. Each age is represented by one color, and 9 day old MDCK cysts are repeated on each graph for reference. The line represents the line of best fit and the shaded area represents the 95% confidence interval. Example MDCK cysts of different ages with approximately the same volume and different numbers of nuclei are shown. The scale bar represents 20  $\mu\text{m}$ .

# Supplemental Figure 13

## MDCK cysts, 7-11 days

## MDCK cysts, 3-17 days

**A**

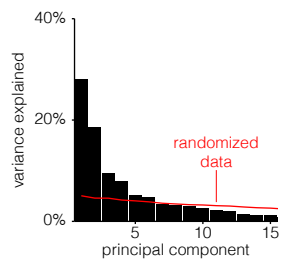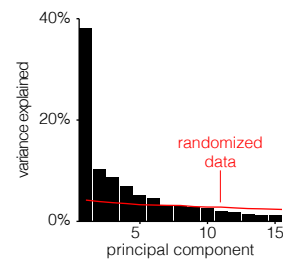

**B**

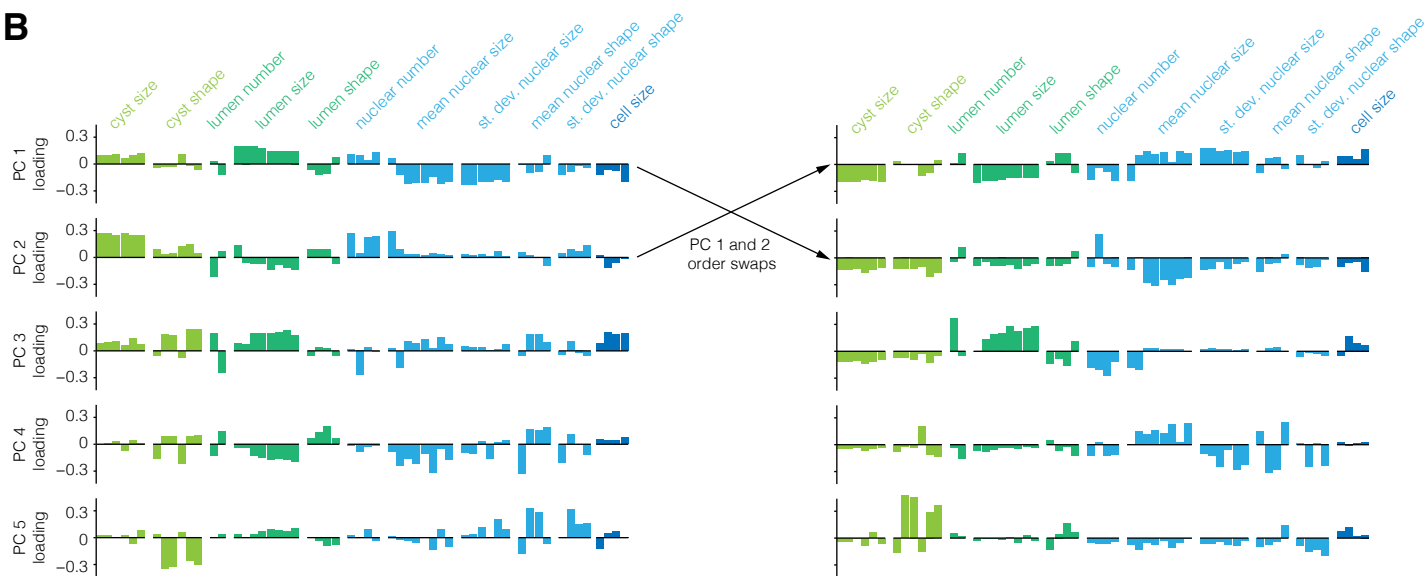

**Supplemental Figure 13: Constraints on MDCK cysts are consistent across cysts of all ages.**

**A.** Variance explained by each principal component. The red line indicates how much variance is explained when the data is randomized before PCA (see methods for details).

**B.** Loading of each feature on principal components one through five. Each feature is color-coded by what structure (cyst, lumen, nucleus, or cell) it describes.

# Supplemental Figure 14

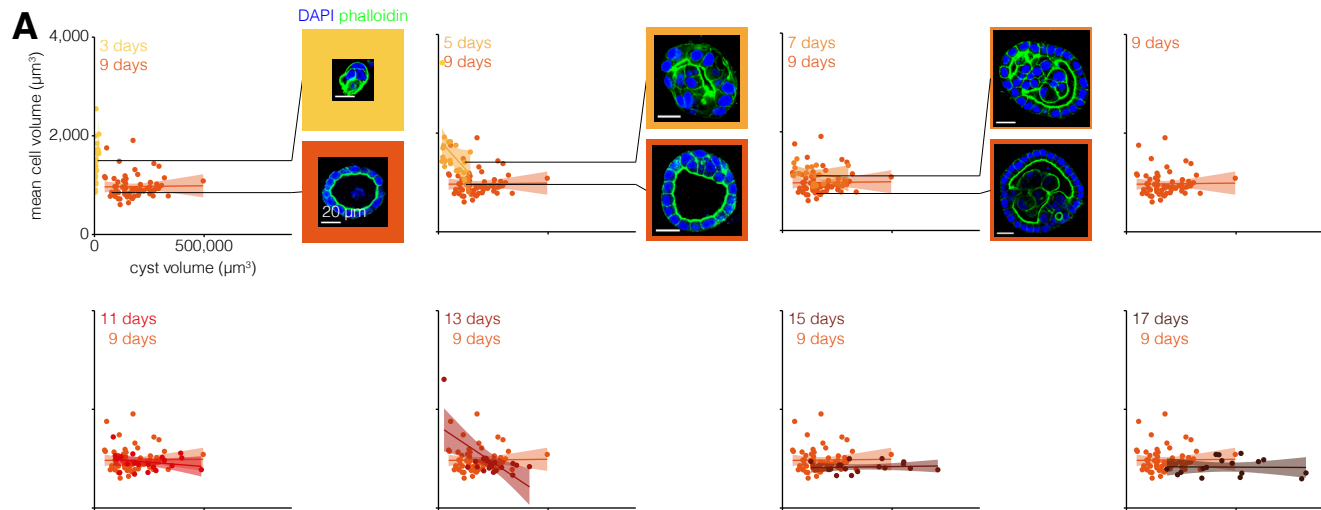

**Supplemental Figure 14: Constraint on cell volume and cyst volume varies with MDCK cyst age.**

**A.** Mean cell volume versus cyst volume for 17-64 MDCK cysts of each age. Each age is represented by one color, and 9 day old MDCK cysts are repeated on each graph for reference. The line represents the line of best fit and the shaded area represents the 95% confidence interval. Example MDCK cysts of different ages with approximately the same cyst volume and different mean cell volume are shown. The scale bar represents 20  $\mu\text{m}$ .

# Supplemental Figure 15

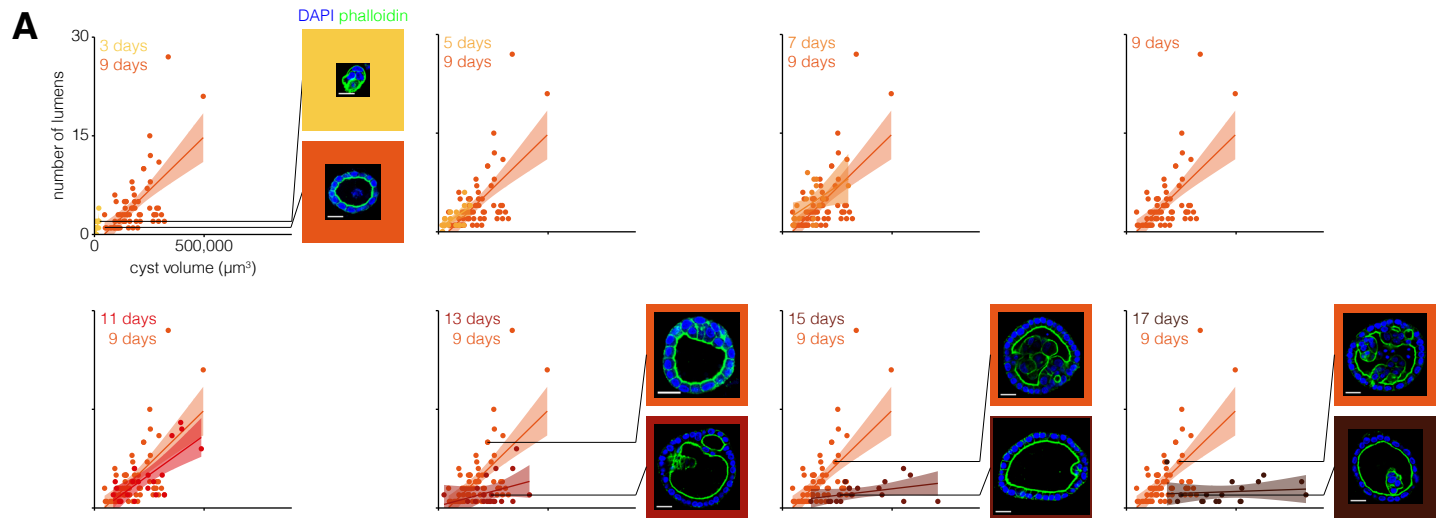

**Supplemental Figure 15: Constraint on number of lumens and cyst volume varies with MDCK cyst age.**

**A.** Number of lumens versus cyst volume for 17-64 MDCK cysts of each age. Each age is represented by one color, and 9 day old MDCK cysts are repeated on each graph for reference. The line represents the line of best fit and the shaded area represents the 95% confidence interval. Example MDCK cysts of different ages with approximately the same cyst volume and different numbers of lumens are shown. The scale bar represents 20  $\mu\text{m}$ .

# Supplemental Figure 16

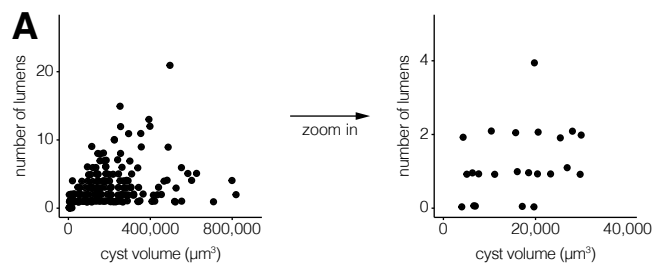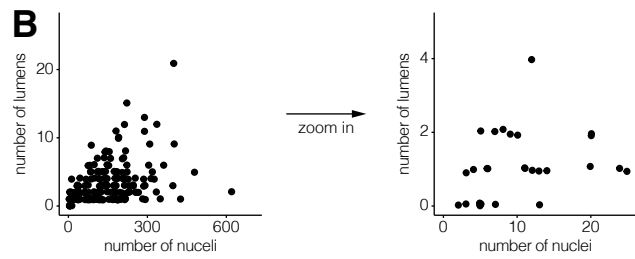



**Supplemental Figure 16: MDCK cysts develop a lumen when they have 7 cells and are 10,000  $\mu\text{m}^3$ .**

**A.** Number of lumens versus cyst volume for 196 MDCK cysts with 3-17 days of growth.

**B.** Number of lumens versus number of cells for 196 MDCK cysts with 3-17 days of growth.

# Supplemental Figure 17

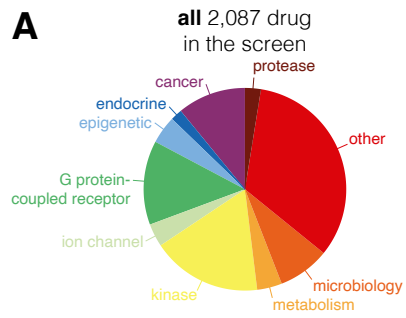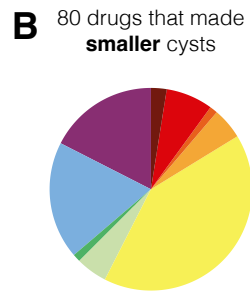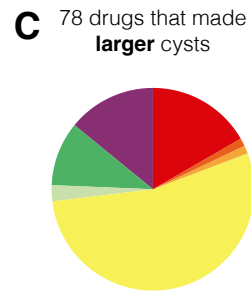

**Supplemental Figure 17: Proportions of drug categories for drug screen.**

- A.** Proportion of drugs categories for all 2,088 drugs screened.
- B.** Proportion of drug categories amongst drugs found to decrease cyst area.
- C.** Proportion of drug categories amongst drugs found to increase cyst area.

## Supplemental Figure 18

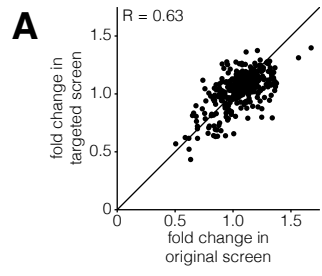

**Supplemental Figure 18: Correlation between original and targeted drug screen.**

**A.** For all 2,088 drugs screened in replicate (1/7th of all drugs screen), the fold change in the targeted screen versus the fold change in the original screen.

# Supplemental Figure 19

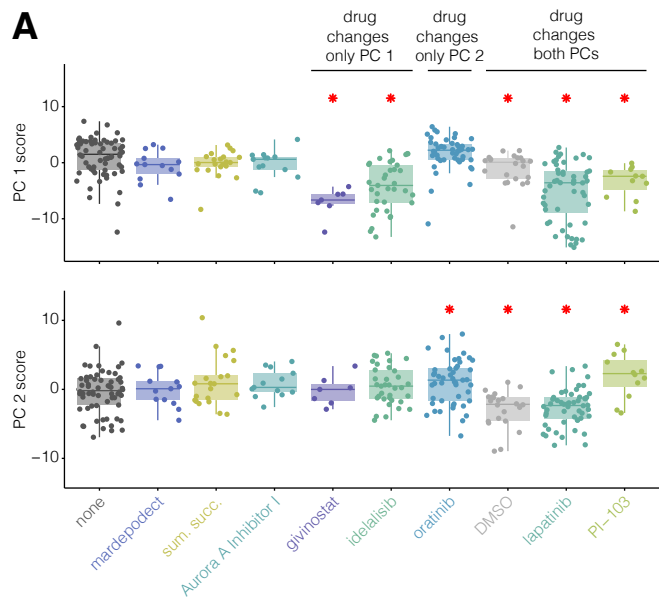

**Supplemental Figure 19: Perturbations can shift MDCK cysts along more than one principal component.**

**A.** Scores of 7-65 MDCK cysts (of various perturbations) when projected into PC space calculated using unperturbed MDCK cysts.

# Supplemental Figure 20

**A** example unperturbed MDCK cysts

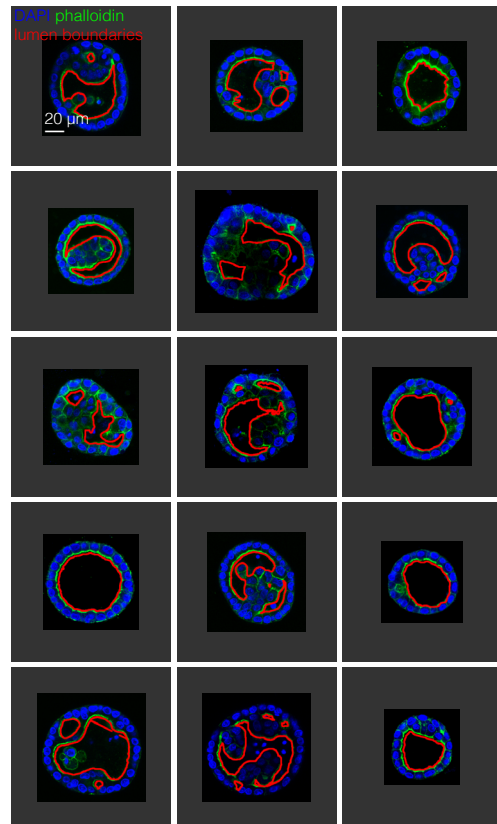

all MDCK cysts perturbed with HGF

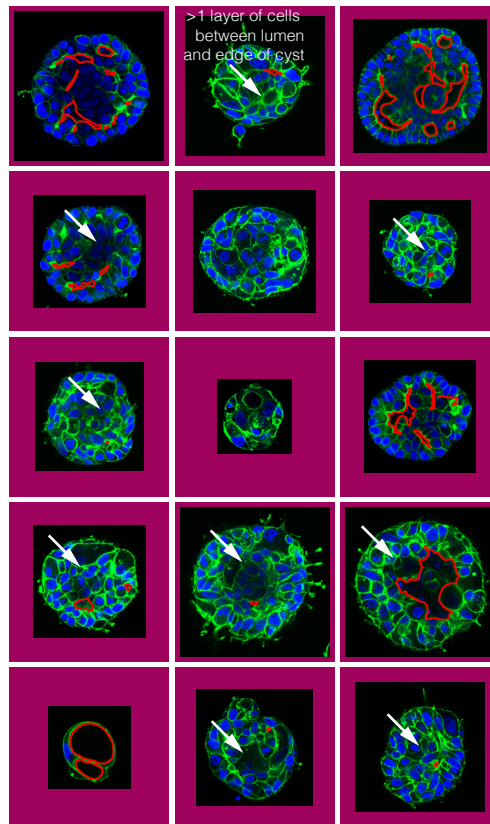



**Supplemental Figure 20: Spindle-like extensions are more common in MDCK cysts perturbed with HGF.**

**A.** 15 randomly-chosen unperturbed MDCK cysts (representative of 64 unperturbed MDCK cysts of age 9 days) and all 15 HGF-perturbed cysts of age 9 days. The boundary of the lumen is outlined in red. Spindle-like extensions are denoted with a white arrow. The scale bar represents 20  $\mu\text{m}$ .

# Supplemental Figure 21

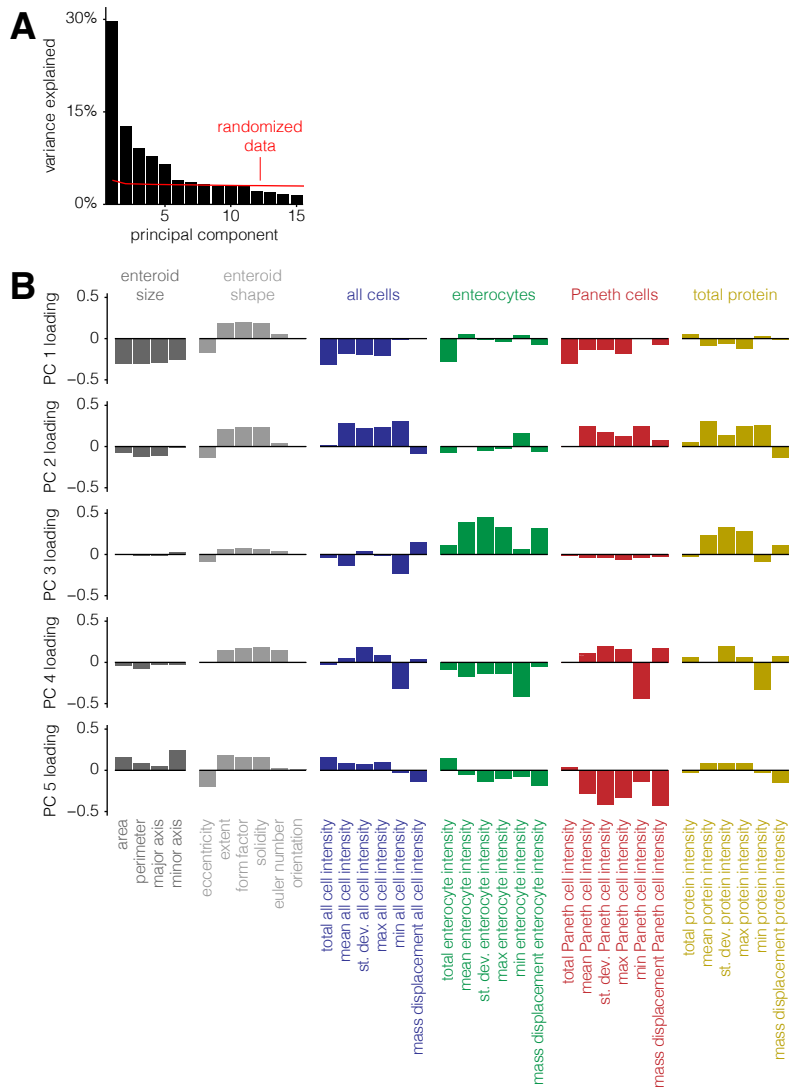

**Supplemental Figure 21: Enteroids obey a similar set of constraints to MDCK cysts.**

**A.** Variance explained by each principal component. The red line indicates how much variance is explained when the data is randomized before PCA (see methods for details).

**B.** Loading of each feature on principal components one through five. Each feature is color-coded by what structure (enteroid size, enteroid shape, all cells, enterocytes, Paneth cells, or total protein) it describes.

# Supplemental Table 1

| Feature                                | Quantities Measured                                                                                                                          | Method                                                                                                                                                                                                                                                                            |
|----------------------------------------|----------------------------------------------------------------------------------------------------------------------------------------------|-----------------------------------------------------------------------------------------------------------------------------------------------------------------------------------------------------------------------------------------------------------------------------------|
| volume ( $\mu\text{m}^3$ )             | cyst volume<br>mean lumen volume<br>mean nuclear volume<br>standard deviation nuclear volume                                                 | 1. Calculate the number of voxels inside the object.<br>2. Multiply by the voxel volume.                                                                                                                                                                                          |
| cell volume ( $\mu\text{m}^3$ )        | mean cell volume                                                                                                                             | 1. Subtract the volume of all lumens from the cyst volume.<br>2. Divide by the number of nuclei.                                                                                                                                                                                  |
| fraction of cyst volume                | lumen fraction of cyst volume<br>nuclear fraction of cyst volume                                                                             | 1. Sum the volume of all lumens/nuclei.<br>2. Divide by the cyst volume.                                                                                                                                                                                                          |
| surface area ( $\mu\text{m}^2$ )       | cyst surface area<br>mean lumen surface area<br>mean nuclear surface area<br>standard deviation nuclear surface area                         | 1. Use MATLAB's regionprops function to calculate the perimeter of the object on each image slice.<br>2. Sum the perimeters over all image slices.<br>3. Multiply by the size of the voxel in XY and the size of the voxel in Z.                                                  |
| XY radius ( $\mu\text{m}$ )            | cyst XY radius<br>mean lumen XY radius<br>mean nuclear XY radius<br>standard deviation nuclear XY radius                                     | 1. Calculate the image slice where the object has the largest area.<br>2. Calculate the center of the object on this slice.<br>3. Measure the distance between all boundary points (on this slice) and the center.<br>4. Take the mean.                                           |
| Z radius ( $\mu\text{m}$ )             | cyst Z radius<br>mean lumen Z radius<br>mean nuclear Z radius<br>standard deviation nuclear Z radius                                         | 1. Calculate the maximum z coordinate of the object.<br>2. Subtract the minimum z coordinate of the object.                                                                                                                                                                       |
| Z radius:XY radius                     | cyst Z radius:XY radius<br>mean lumen Z radius:XY radius<br>mean nuclear Z radius:XY radius<br>standard deviation nuclear Z radius:XY radius | 1. Divide the Z radius by the XY radius.                                                                                                                                                                                                                                          |
| 3D radius                              | cyst 3D radius standard deviation<br>cyst 3D radius coefficient of variation                                                                 | 1. Calculate the image slice where the object has the largest area.<br>2. Calculate the center of the object on this slice.<br>3. Measure the distance between all boundary points (on this slice) and the center.<br>4. Take the standard deviation or coefficient of variation. |
| external cell height ( $\mu\text{m}$ ) | external cell height                                                                                                                         | 1. For every cyst coordinate, calculate the distance to the nearest lumen coordinate.<br>2. Take the mean.                                                                                                                                                                        |
| external cell width ( $\mu\text{m}$ )  | mean external cell width<br>standard deviation external cell width                                                                           | 1. Calculate the center of each nucleus.<br>2. For each nucleus, calculate the distance to the nearest nucleus center.                                                                                                                                                            |
| major axis ( $\mu\text{m}$ )           | cyst major axis<br>mean lumen major axis<br>mean nuclear major axis<br>standard deviation nuclear major axis                                 | 1. Calculate the image slice where the object has the largest area.<br>2. Use MATLAB's regionprops function to calculate the major axis of the object on that slice.<br>3. Divide by 2.<br>4. Multiply by the size of the voxel in XY.                                            |
| minor axis ( $\mu\text{m}$ )           | cyst minor axis<br>mean lumen minor axis<br>mean nuclear minor axis<br>standard deviation nuclear minor axis                                 | 1. Calculate the image slice where the object has the largest area.<br>2. Use MATLAB's regionprops function to calculate the minor axis of the object on that slice.<br>3. Divide by 2.<br>4. Multiply by the size of the voxel in XY.                                            |
| major:minor axis                       | cyst major:minor axis<br>mean lumen major:minor axis<br>mean nuclear major:minor axis<br>standard deviation nuclear major:minor axis         | 1. Divide the major axis by the minor axis.                                                                                                                                                                                                                                       |
| solidity                               | cyst solidity<br>mean lumen solidity<br>mean nuclear solidity<br>standard deviation nuclear solidity                                         | 1. Use MATLAB's regionprops function to calculate the solidity of the 3D object.                                                                                                                                                                                                  |
| eccentricity                           | cyst eccentricity<br>mean lumen eccentricity<br>mean nuclear eccentricity<br>standard deviation nuclear eccentricity                         | 1. Calculate the image slice where the object has the largest area.<br>2. Use MATLAB's regionprops function to calculate the eccentricity of the object on that slice.                                                                                                            |
| number                                 | number of lumens<br>number of nuclei<br>number of internal nuclei<br>number of external nuclei                                               | 1. Count the number of objects.                                                                                                                                                                                                                                                   |
| density                                | density of lumens<br>density of nuclei                                                                                                       | 1. Divide the number of objects by the cyst volume.                                                                                                                                                                                                                               |

**Supplemental Table 1: MDCK Cyst Morphological Features.**

## Supplemental Table 2

| Drug                  | Concentrations        |
|-----------------------|-----------------------|
| selinexor             | 0.1, 0.3 $\mu$ M      |
| lapatinib             | 40, 130, 400 nM       |
| givinostat            | 0.1 $\mu$ M           |
| PI-103                | 0.1, 0.3 $\mu$ M      |
| idelalisib            | 3, 10, 30 $\mu$ M     |
| mardepodect           | 0.1, 1.0 $\mu$ M      |
| sumatriptan succinate | 0.1, 0.3, 1.0 $\mu$ M |
| Aurora A Inhibitor I  | 0.1, 0.3, 1.0 $\mu$ M |
| orantinib             | 0.5, 1.6, 5.0 $\mu$ M |
| Y-27632               | 10 $\mu$ M            |
| NSC23766              | 30 $\mu$ M            |
| blebbistatin          | 10 $\mu$ M            |
| HGF                   | 5, 20 ng/mL           |

**Supplemental Table 2: Perturbation Drugs and Concentrations.**

### Supplemental Table 3

| Drug                                    | Selleckchem<br>Catalog Number | Target(s)                     |
|-----------------------------------------|-------------------------------|-------------------------------|
| ✓ Indicates used for follow-up analysis |                               |                               |
| <u>PI3K/AKT/mTOR</u>                    |                               |                               |
| A66                                     | S2636                         | PI3K                          |
| CZC24832                                | S7018                         | PI3K                          |
| NU7026                                  | S2893                         | DNA-PK                        |
| ✓ PI-103                                | S1038                         | PI3K, Autophagy, DNA-PK, mTOR |
| PP242                                   | S2218                         | mTOR, Autophagy               |
| YM201636                                | S1219                         | PI3K                          |
| CCT128930                               | S2635                         | Akt                           |
| MK-2206 2HCl                            | S1078                         | Akt                           |
| <u>DNA Damage</u>                       |                               |                               |
| Caffeic Acid Phenethyl Ester            | S7414                         | NF-kB                         |
| VE-822                                  | S7102                         | ATM/ATR                       |
| Capecitabine                            | S1156                         | DNA/RNA Synthesis             |
| Costunolide                             | S1319                         | Telomerase                    |
| <u>Aurora Kinase</u>                    |                               |                               |
| ✓ Aurora A Inhibitor I                  | S1451                         | Aurora Kinase                 |
| CCT137690                               | S2744                         | Aurora Kinase                 |
| CYC116                                  | S1171                         | Aurora Kinase, VEGFR          |
| <u>Bcr-Abl</u>                          |                               |                               |
| DCC-2036 (Rebastinib)                   | S2634                         | Bcr-Abl                       |
| GZD824                                  | S7194                         | Bcr-Abl                       |
| Nilotinib (AMN-107)                     | S1033                         | Bcr-Abl                       |
| <u>CDK</u>                              |                               |                               |
| AT7519                                  | S1524                         | CDK                           |
| MK-8776 (SCH 900776)                    | S2735                         | CDK, Chk                      |
| Palbociclib (PD-0332991) HCl            | S1116                         | CDK                           |
| <u>RAF/MEK/ERK</u>                      |                               |                               |
| AZ 628                                  | S2746                         | Raf                           |
| GW5074                                  | S2872                         | Raf                           |
| SB590885                                | S2220                         | Raf                           |
| <u>Adrenergic Receptor</u>              |                               |                               |
| Clorprenaline HCl                       | S4135                         | Beta2 receptor                |
| Xylazine HCl                            | S2516                         | Adrenergic Receptor           |
| <u>Histamine</u>                        |                               |                               |
| Cimetidine                              | S1845                         | Histamine Receptor            |
| Ketotifen Fumarate                      | S2024                         | Histamine Receptor            |
| <u>JAK</u>                              |                               |                               |
| CYT387                                  | S2219                         | JAK                           |
| Ruxolitinib (INCB018424)                | S1378                         | JAK                           |
| <u>PDE</u>                              |                               |                               |
| ✓ PF-2545920                            | S2687                         | PDE                           |
| Pentoxifylline                          | S4345                         | PDE                           |



### Serotonin

|                         |       |               |
|-------------------------|-------|---------------|
| ✓ Sumatriptan Succinate | S1432 | 5-HT Receptor |
| Trazodone HCl           | S2582 | 5-HT Receptor |

### Src

|                     |       |     |
|---------------------|-------|-----|
| Bosutinib (SKI-606) | S1014 | Src |
| PP1                 | S7060 | Src |

### Unique Targets

|                             |       |                               |
|-----------------------------|-------|-------------------------------|
| Glipizide                   | S1715 | Potassium channels            |
| Ampfenac Sodium Monohydrate | S4149 | COX                           |
| Ferulic Acid                | S2300 |                               |
| Formononetin                | S2299 |                               |
| Meprednisone                | S1689 | glucocorticoid                |
| Mometasone furoate          | S1987 | corticosteroid                |
| Penicillin G Sodium         | S4160 | antibiotic                    |
| Rifaximin                   | S1790 | RNA polymerase                |
| Thiamet G                   | S7213 | O-GlcNAcase                   |
| Triamcinolone Acetonide     | S1628 | corticosteroid                |
| VGX-1027                    | S7515 | TLR4                          |
| (-)-Blebbistatin            | S7099 | ATPase                        |
| Cyclopamine                 | S1146 | Hedgehog                      |
| DMXAA (Vadimezan)           | S1537 | VDA                           |
| Dexamethasone acetate       | S3124 | interleukin receptor          |
| Fasudil (HA-1077) HCl       | S1573 | ROCK, Autophagy               |
| Fingolimod (FTY720) HCl     | S5002 | S1P Receptor                  |
| GDC-0152                    | S7010 | IAP                           |
| GSK3787                     | S8025 | PPAR                          |
| GW788388                    | S2750 | TGF-beta/Smad                 |
| Griseofulvin                | S4071 | Microtubule Associated        |
| Indirubin                   | S2386 | GSK-3                         |
| Isradipine                  | S1662 | Calcium Channel               |
| Mifepristone                | S2606 | Estrogen/progestogen Receptor |
| Mubritinib (TAK 165)        | S2216 | HER2                          |
| AG-1024                     | S1234 | IGF-1R                        |
| PHA-665752                  | S1070 | c-Met                         |
| PX-478 2HCl                 | S7612 | HIF                           |
| SB216763                    | S1075 | GSK-3                         |
| SKLB1002                    | S7258 | VEGFR                         |
| Sitaxentan sodium           | S3034 | Endothelin Receptor           |
| Sotrastaurin                | S2791 | PKC                           |
| Thioguanine                 | S1774 | DNMT1                         |
| VX-745                      | S1458 | p38 MAPK                      |
| Thiamine HCl (Vitamin B1)   | S3211 | Vitamin B                     |
| Disodium Cromoglycate       | S1911 | antiallergic drug             |

### Non-Specific Targets

|                                  |       |                                           |
|----------------------------------|-------|-------------------------------------------|
| Cabozantinib (XL184, BMS-907351) | S1119 | FLT3, Tie-2, c-Kit, c-Met, VEGFR, Axl     |
| Dovitinib (TKI-258, CHIR-258)    | S1018 | FGFR, FLT3, c-Kit, VEGFR, PDGFR           |
| Golvatinib (E7050)               | S2859 | VEGFR, c-Met                              |
| NVP-BHG712                       | S2202 | Raf, Src, Bcr-Abl, VEGFR, Ephrin receptor |
| Ponatinib (AP24534)              | S1490 | PDGFR, FGFR, VEGFR, Bcr-Abl               |
| TG101209                         | S2692 | JAK, FLT3, c-RET                          |

**Supplemental Table 3: Hits for Larger MDCK Cysts from Drug Screen, Grouped by Target.**

## Supplemental Table 4

| Drug                                    | Selleckchem<br>Catalog Number | Target(s)          |
|-----------------------------------------|-------------------------------|--------------------|
| ✓ Indicates used for follow-up analysis |                               |                    |
| <u>EGFR/HER2</u>                        |                               |                    |
| AEE788 (NVP-AEE788)                     | S1486                         | HER2,VEGFR,EGFR    |
| AZD8931 (Sapitinib)                     | S2192                         | HER2,EGFR          |
| Afatinib (BIBW2992)                     | S1011                         | EGFR,HER2          |
| Canertinib (CI-1033)                    | S1019                         | EGFR,HER2          |
| Dacomitinib (PF299804, PF299)           | S2727                         | EGFR               |
| Gefitinib (ZD1839)                      | S1025                         | EGFR               |
| ✓ Lapatinib (GW-572016) Ditosylate      | S1028                         | HER2,EGFR          |
| Neratinib (HKI-272)                     | S2150                         | HER2,EGFR          |
| Pelitinib (EKB-569)                     | S1392                         | EGFR               |
| <u>HDAC</u>                             |                               |                    |
| AR-42                                   | S2244                         | HDAC               |
| Belinostat (PXD101)                     | S1085                         | HDAC               |
| Entinostat (MS-275)                     | S1053                         | HDAC               |
| ✓ Givinostat (ITF2357)                  | S2170                         | HDAC               |
| M344                                    | S2779                         | HDAC               |
| Mocetinostat (MGCD0103)                 | S1122                         | HDAC               |
| PCI-24781 (Abexinostat)                 | S1090                         | HDAC               |
| Pracinostat (SB939)                     | S1515                         | HDAC               |
| Scriptaid                               | S8043                         | HDAC               |
| <u>PI3K/AKT/mTOR</u>                    |                               |                    |
| AZD8055                                 | S1555                         | mTOR               |
| Everolimus (RAD001)                     | S1120                         | mTOR               |
| GDC-0980 (RG7422)                       | S2696                         | mTOR,PI3K          |
| WYE-125132 (WYE-132)                    | S2661                         | mTOR               |
| GSK2126458 (GSK458)                     | S2658                         | PI3K,mTOR          |
| INK 128 (MLN0128)                       | S2811                         | mTOR               |
| Torin 2                                 | S2817                         | ATM/ATR,mTOR       |
| <u>Aurora Kinase</u>                    |                               |                    |
| AMG-900                                 | S2719                         | Aurora Kinase      |
| Barasertib (AZD1152-HQPA)               | S1147                         | Aurora Kinase      |
| GSK1070916                              | S2740                         | Aurora Kinase      |
| Hesperadin                              | S1529                         | Aurora Kinase      |
| PF-03814735                             | S2725                         | Aurora Kinase, FAK |
| SNS-314 Mesylate                        | S1154                         | Aurora Kinase      |
| <u>Topoisomerase</u>                    |                               |                    |
| Idarubicin HCl                          | S1228                         | Topoisomerase      |
| SN-38                                   | S4908                         | Topoisomerase      |
| Topotecan HCl                           | S1231                         | Topoisomerase      |
| Camptothecin                            | S1288                         | Topoisomerase      |
| Mitoxantrone HCl                        | S2485                         | Topoisomerase      |
| Teniposide                              | S1787                         | Topoisomerase      |
| <u>RAF/MEK/ERK</u>                      |                               |                    |
| AZD8330                                 | S2134                         | MEK                |
| PD0325901                               | S1036                         | MEK                |
| Pimasertib (AS-703026)                  | S1475                         | MEK                |

|                                 |       |                                     |
|---------------------------------|-------|-------------------------------------|
| TAK-733                         | S2617 | MEK                                 |
| Trametinib (GSK1120212)         | S2673 | MEK                                 |
| <u>CRM1</u>                     |       |                                     |
| KPT-185                         | S7125 | CRM1                                |
| KPT-276                         | S7251 | CRM1                                |
| ✓ KPT-330                       | S7252 | CRM1                                |
| <u>Epigenetic Reader Domain</u> |       |                                     |
| (+)-JQ1                         | S7110 | Epigenetic Reader Domain            |
| CPI-203                         | S7304 | Epigenetic Reader Domain            |
| GSK1324726A (I-BET726)          | S7620 | Epigenetic Reader Domain            |
| <u>Microtubule Associated</u>   |       |                                     |
| Vinblastine                     | S1248 | Microtubule Associated              |
| Nocodazole                      | S2775 | Microtubule Associated, Autophagy   |
| Fosbretabulin Disodium          | S7204 | Microtubule Associated, Autophagy   |
| <u>CDK</u>                      |       |                                     |
| Flavopiridol HCl                | S2679 | CDK                                 |
| PHA-793887                      | S1487 | CDK                                 |
| <u>DHFR</u>                     |       |                                     |
| Pralatrexate                    | S1497 | DHFR                                |
| Methotrexate                    | S1210 | DHFR                                |
| <u>Unique Targets</u>           |       |                                     |
| LB42708                         | S7467 | Ftase                               |
| MPI-0479605                     | S7488 | Kinesin                             |
| NSC697923                       | S7142 | E2                                  |
| ONX-0914 (PR-957)               | S7172 | Proteasome                          |
| OTX015                          | S7360 | BET                                 |
| Olanzapine                      | S2493 | 5-HT Receptor, Dopamine Receptor    |
| Oligomycin A                    | S1478 | ATPase                              |
| RG108                           | S2821 | Transferase, DNA Methyltransferase  |
| Raltitrexed                     | S1192 | DNA/RNA Synthesis                   |
| Roflumilast                     | S2131 | PDE                                 |
| Volasertib (BI 6727)            | S2235 | PLK                                 |
| Tipifarnib                      | S1453 | Transferase                         |
| Erastin                         | S7242 | Ferroptosis                         |
| A-769662                        | S2697 | AMPK                                |
| BIIB021                         | S1175 | HSP (e.g. HSP90)                    |
| BMN 673                         | S7048 | PARP                                |
| Cephalomannine                  | S2408 | Taxol                               |
| Evodiamine                      | S2382 |                                     |
| Flubendazole                    | S1837 | antihelminic                        |
| Y-320                           | S7516 |                                     |
| Guanethidine Sulfate            | S4328 |                                     |
| Nanchangmycin                   | S1450 |                                     |
| Acetanilide                     | S2538 |                                     |
| <u>Non-Specific Targets</u>     |       |                                     |
| AT9283                          | S1134 | JAK, Aurora Kinase, Bcr-Abl         |
| Danuserib (PHA-739358)          | S1107 | c-RET, FGFR, Bcr-Abl, Aurora Kinase |

**Supplemental Table 4: Hits for Smaller MDCK Cysts from Drug Screen, Grouped by Target.**
